# Supplementary material for: Interplay of chemical structure and magnetic order coupling at the interface between Cr2O3 and Fe3O4 in hybrid nanocomposites
Source: Royal Society of Chemistry journal article supplement (doi:10.1039/c4cp01898b), 2014-01-01
Supplement: c4cp01898b1.pdf [file c4cp01898b1.pdf]

## Interplay of chemical structure and magnetic order coupling at the interface between $\text{Cr}_2\text{O}_3$ and $\text{Fe}_3\text{O}_4$ in Hybrid Nanocomposites

Ruth Otero-Lorenzo,<sup>a</sup> Mads C. Weber,<sup>b,c</sup> Pam A. Thomas,<sup>d</sup> Jens Kreisel,<sup>b</sup> Verónica Salgueiriño<sup>a,\*</sup>

<sup>a</sup> Departamento de Física Aplicada, Universidade de Vigo, 36310 Vigo, Spain.

<sup>b</sup> Département Sciences et Analyses des Matériaux, CRP Gabriel Lippmann, 4422 Belvaux, Luxembourg.

<sup>c</sup> University of Luxembourg, 1511 Luxembourg, Luxembourg.

<sup>d</sup> Department of Physics, University of Warwick, Gibbet Hill Road, Coventry, CV4 7AL, UK.

\* [vsalgue@uvigo.es](mailto:vsalgue@uvigo.es)

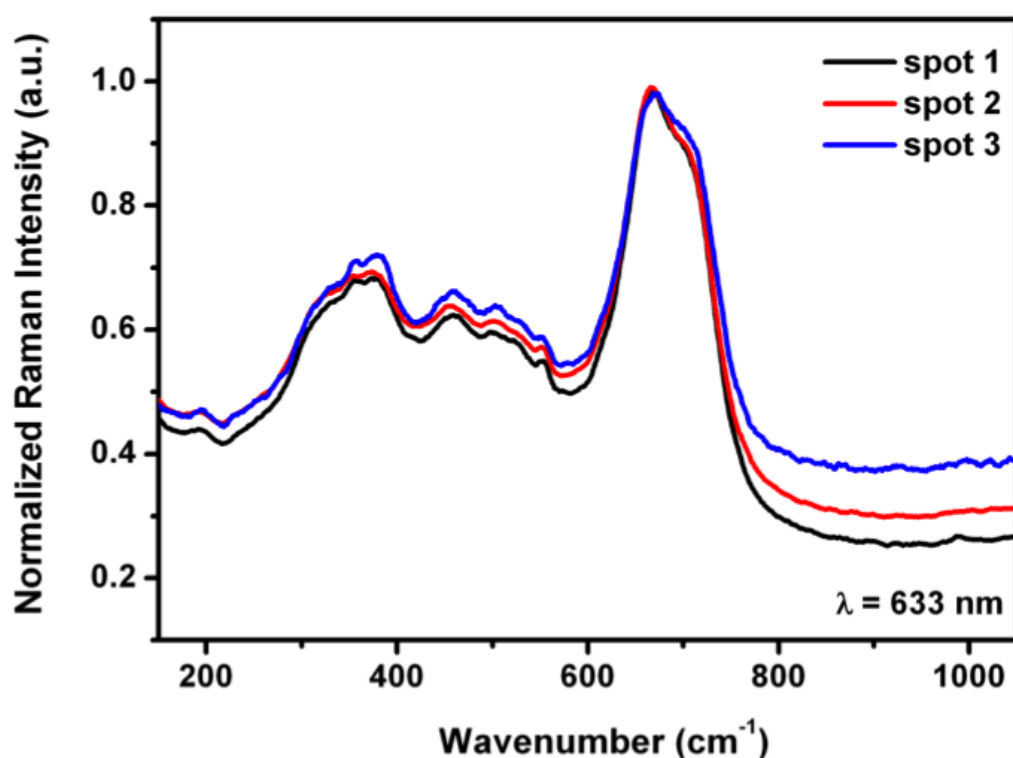

Figure S1. Raman spectra of the hybrid nanostructures as dried powder onto the sample holder, collected at room temperature and in three different spots of the sample using the 633 nm excitation wavelength.

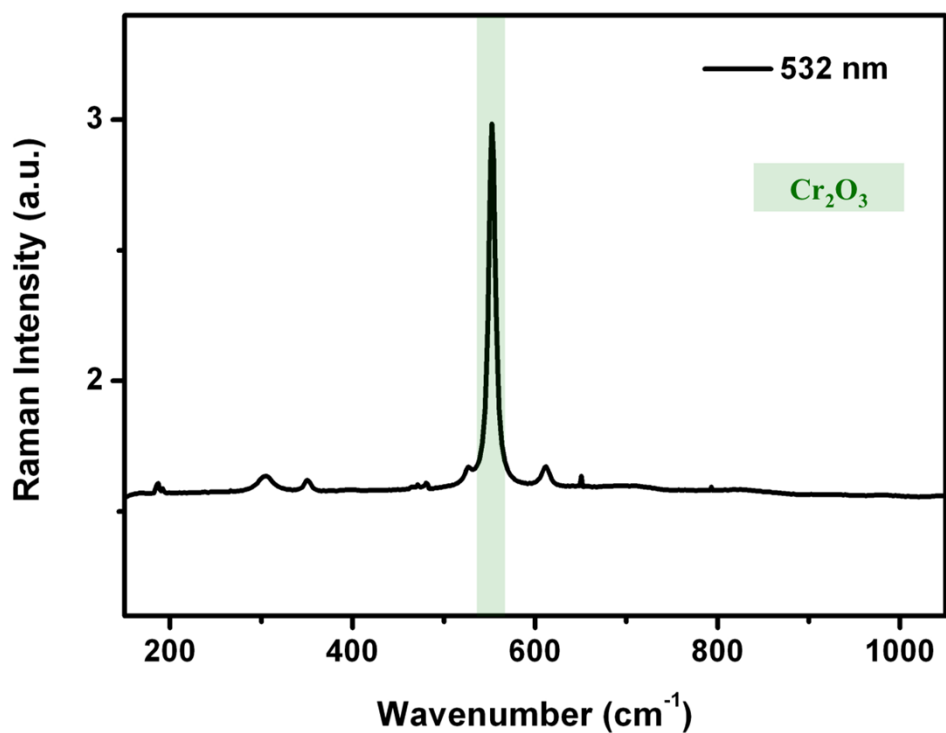

Figure S2. Raman spectrum obtained using a 532 nm excitation wavelength of the Cr<sub>2</sub>O<sub>3</sub> nanoparticles previously synthesized.

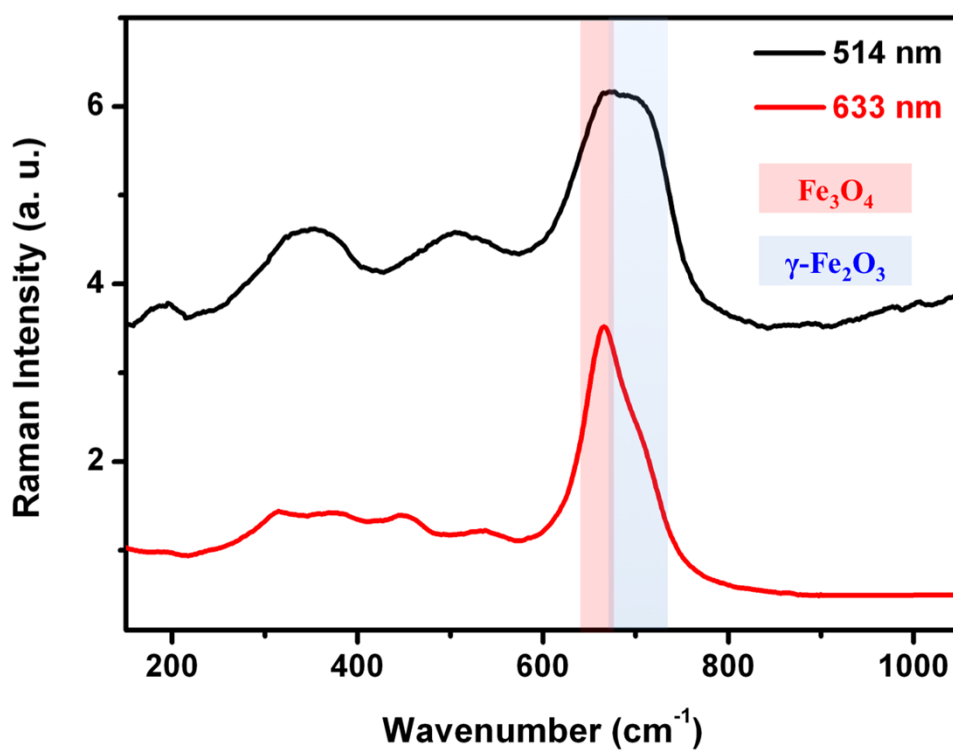

Figure S3. Raman spectra obtained using a 514 and 633 nm excitation wavelength of Fe<sub>3</sub>O<sub>4</sub>-based nanocomposites synthesized in the absence of Cr<sub>2</sub>O<sub>3</sub> nanoparticles.

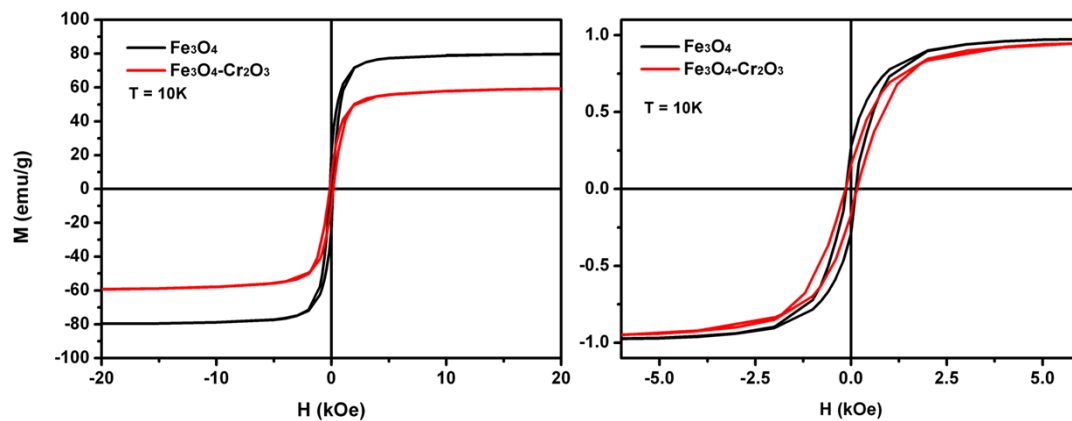

Figure S4. Hysteresis loops of two samples of magnetite nanocomposites (normalized on the graph on the right), synthesized in the absence and presence of  $\text{Cr}_2\text{O}_3$  nanoparticles.

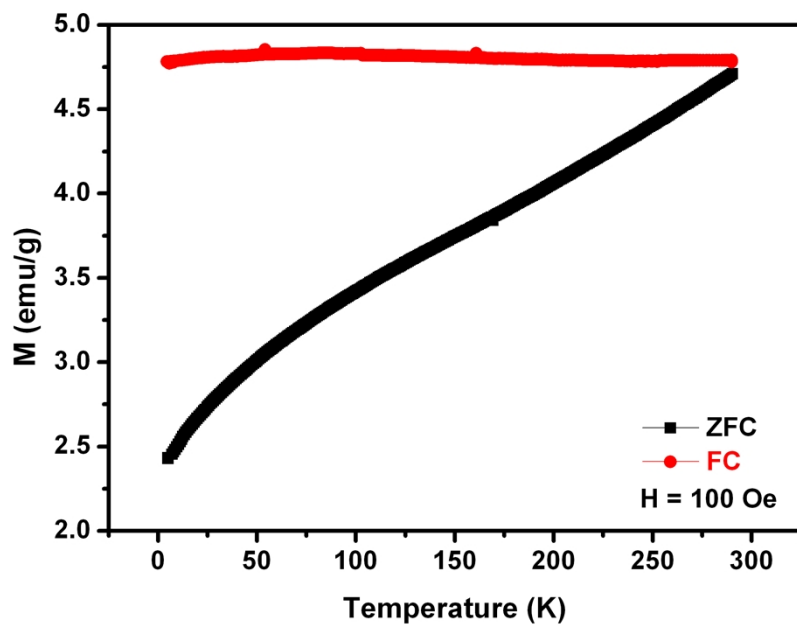

Figure S5. Temperature dependent magnetization curves (in ZFC-FC conditions) of the hybrid nanocomposites.
